# Supplementary material
Source: bioRxiv or medRxiv preprint supplement (https://www.biorxiv.org/highwire/filestream/23330/field_highwire_adjunct_files/1/083931-10.pdf)

Figure S10.1

*H. melpomene*

Split reads and trio assembly

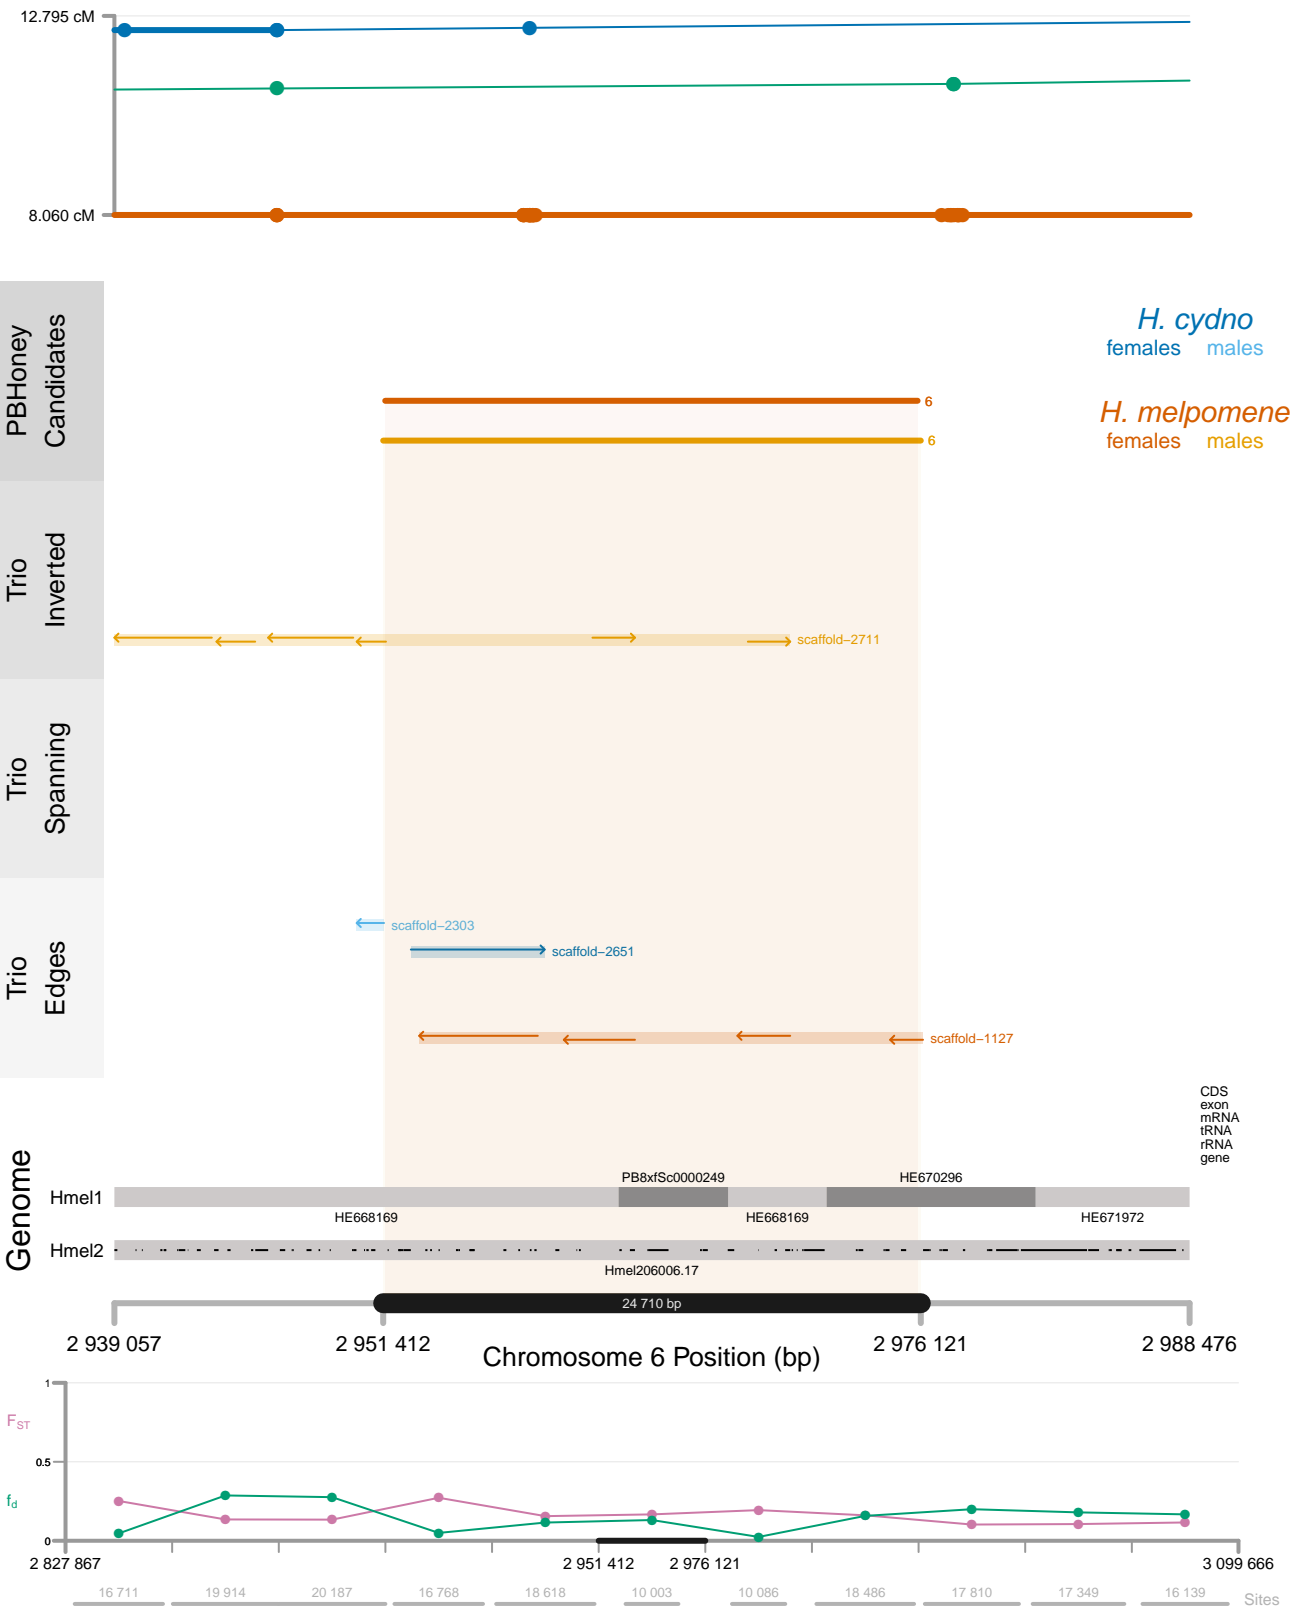

*H. cydno*  
females males

*H. melpomene*  
females males

CDS  
exon  
mRNA  
tRNA  
rRNA  
gene

Chromosome 6 Position (bp)

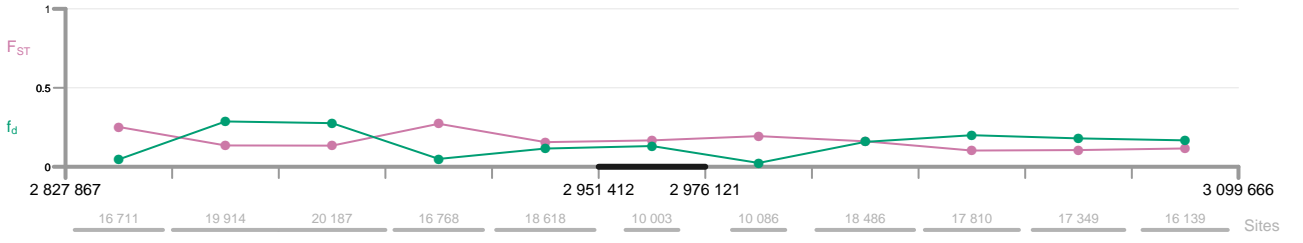

Figure S10.2

*H. melpomene*

Split reads and trio assembly

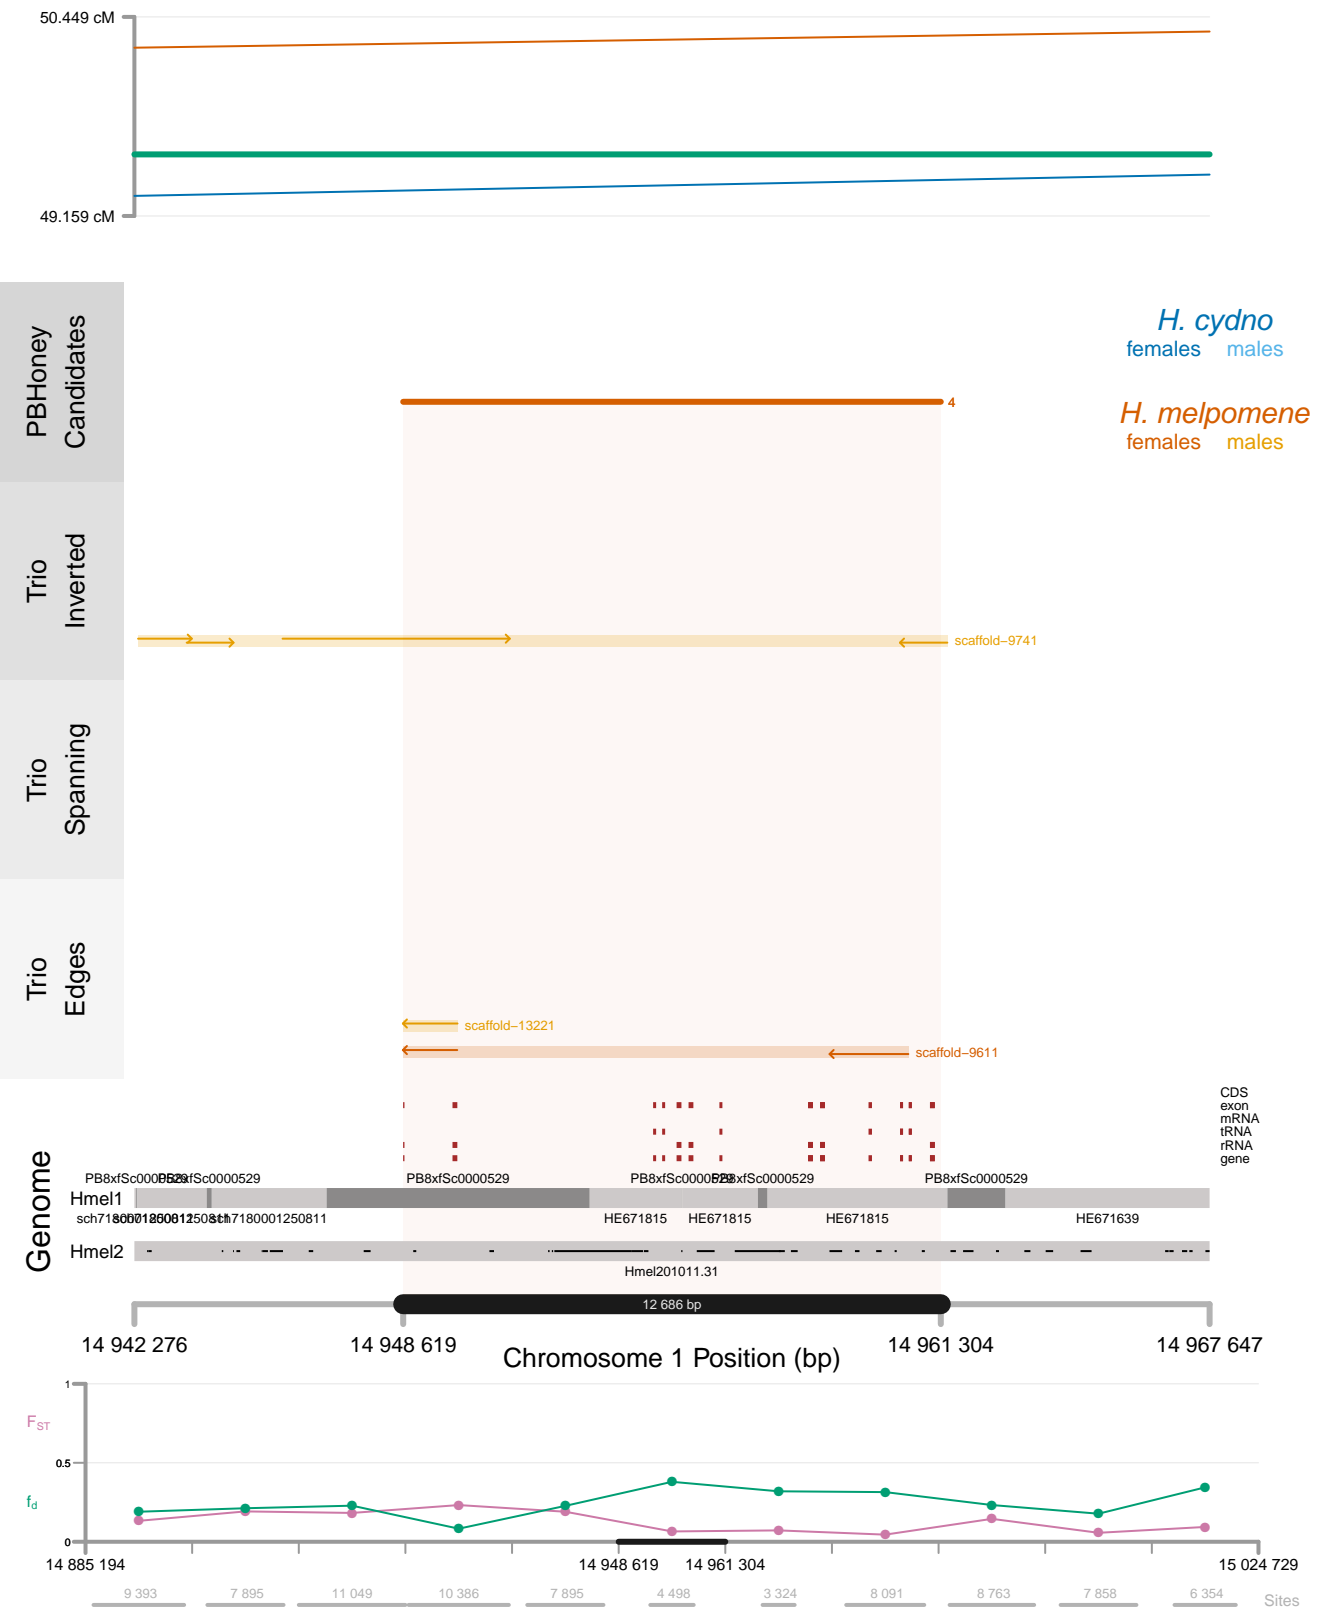

Figure S10.3

*H. melpomene*

Split reads and trio assembly

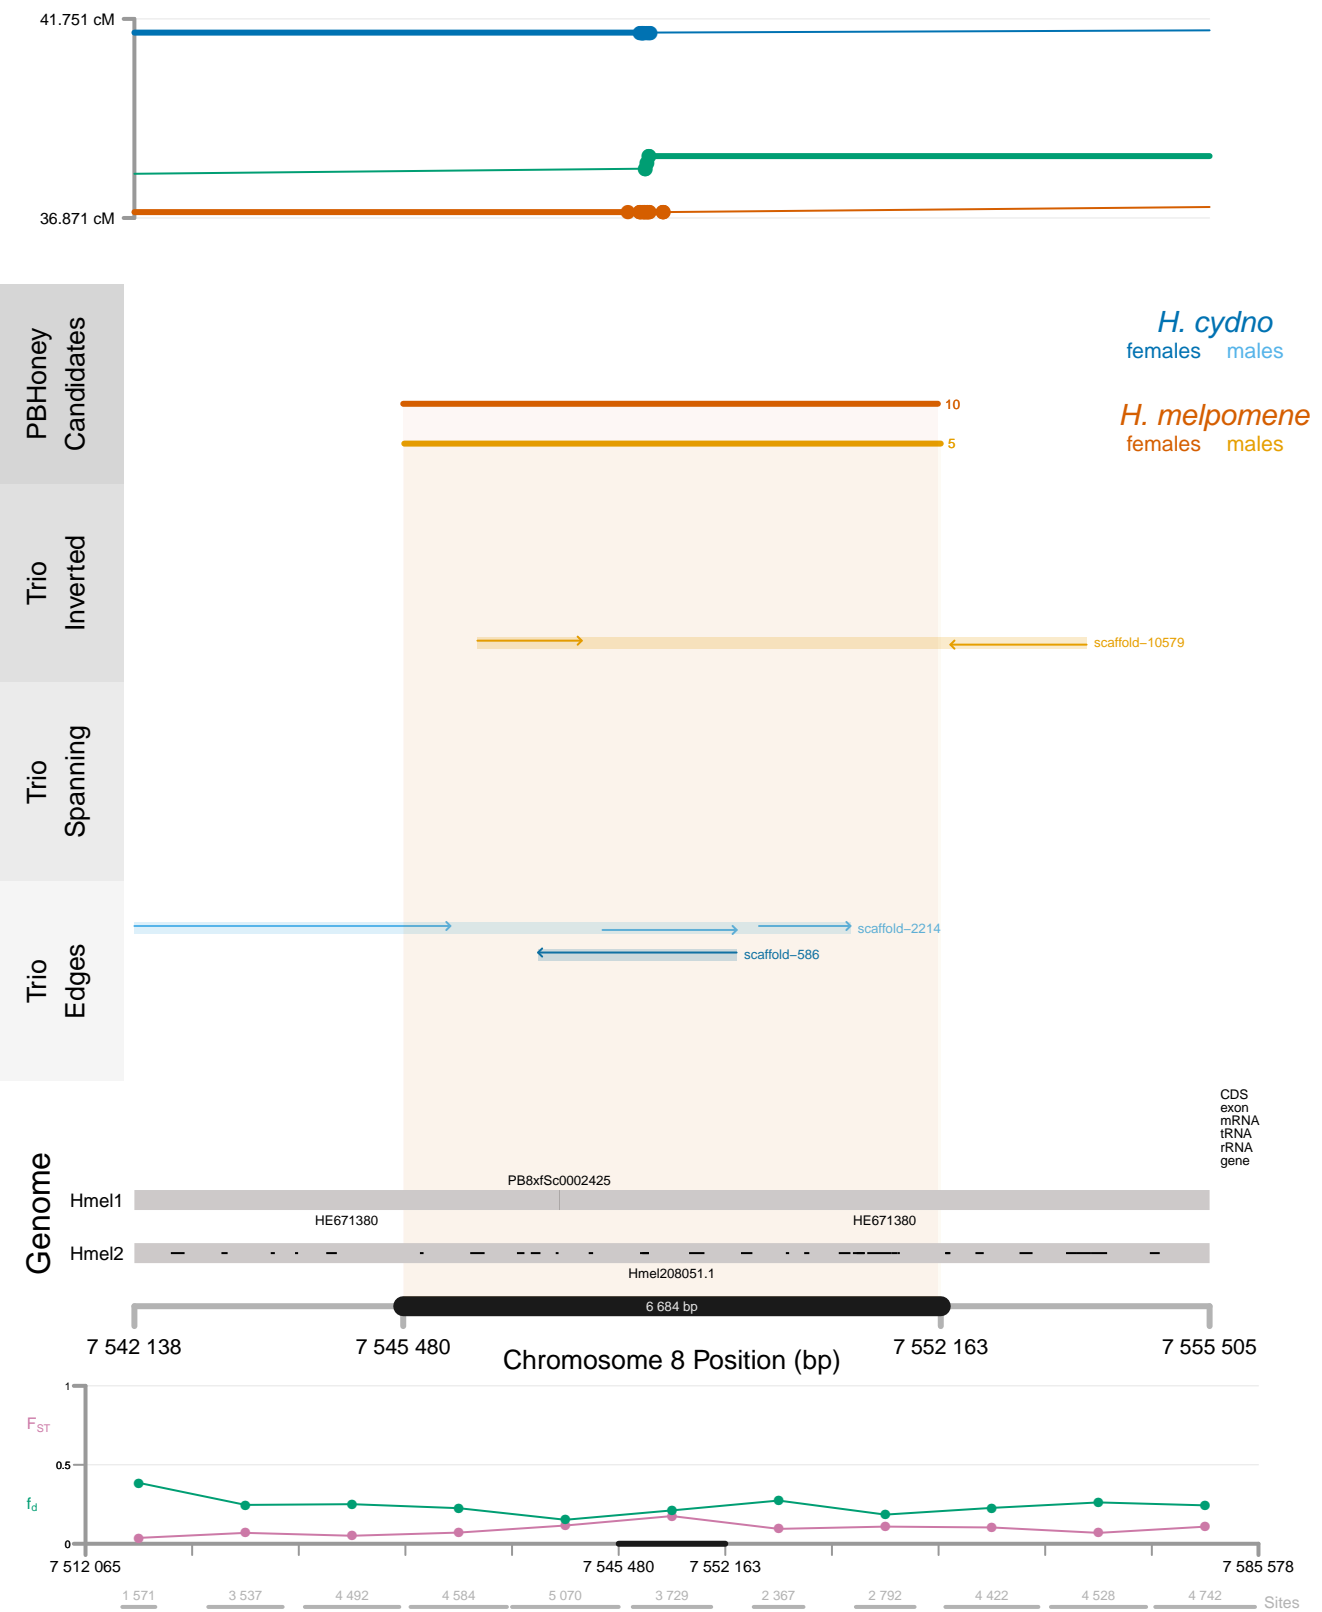

Figure S10.4

*H. melpomene*

Split reads and trio assembly

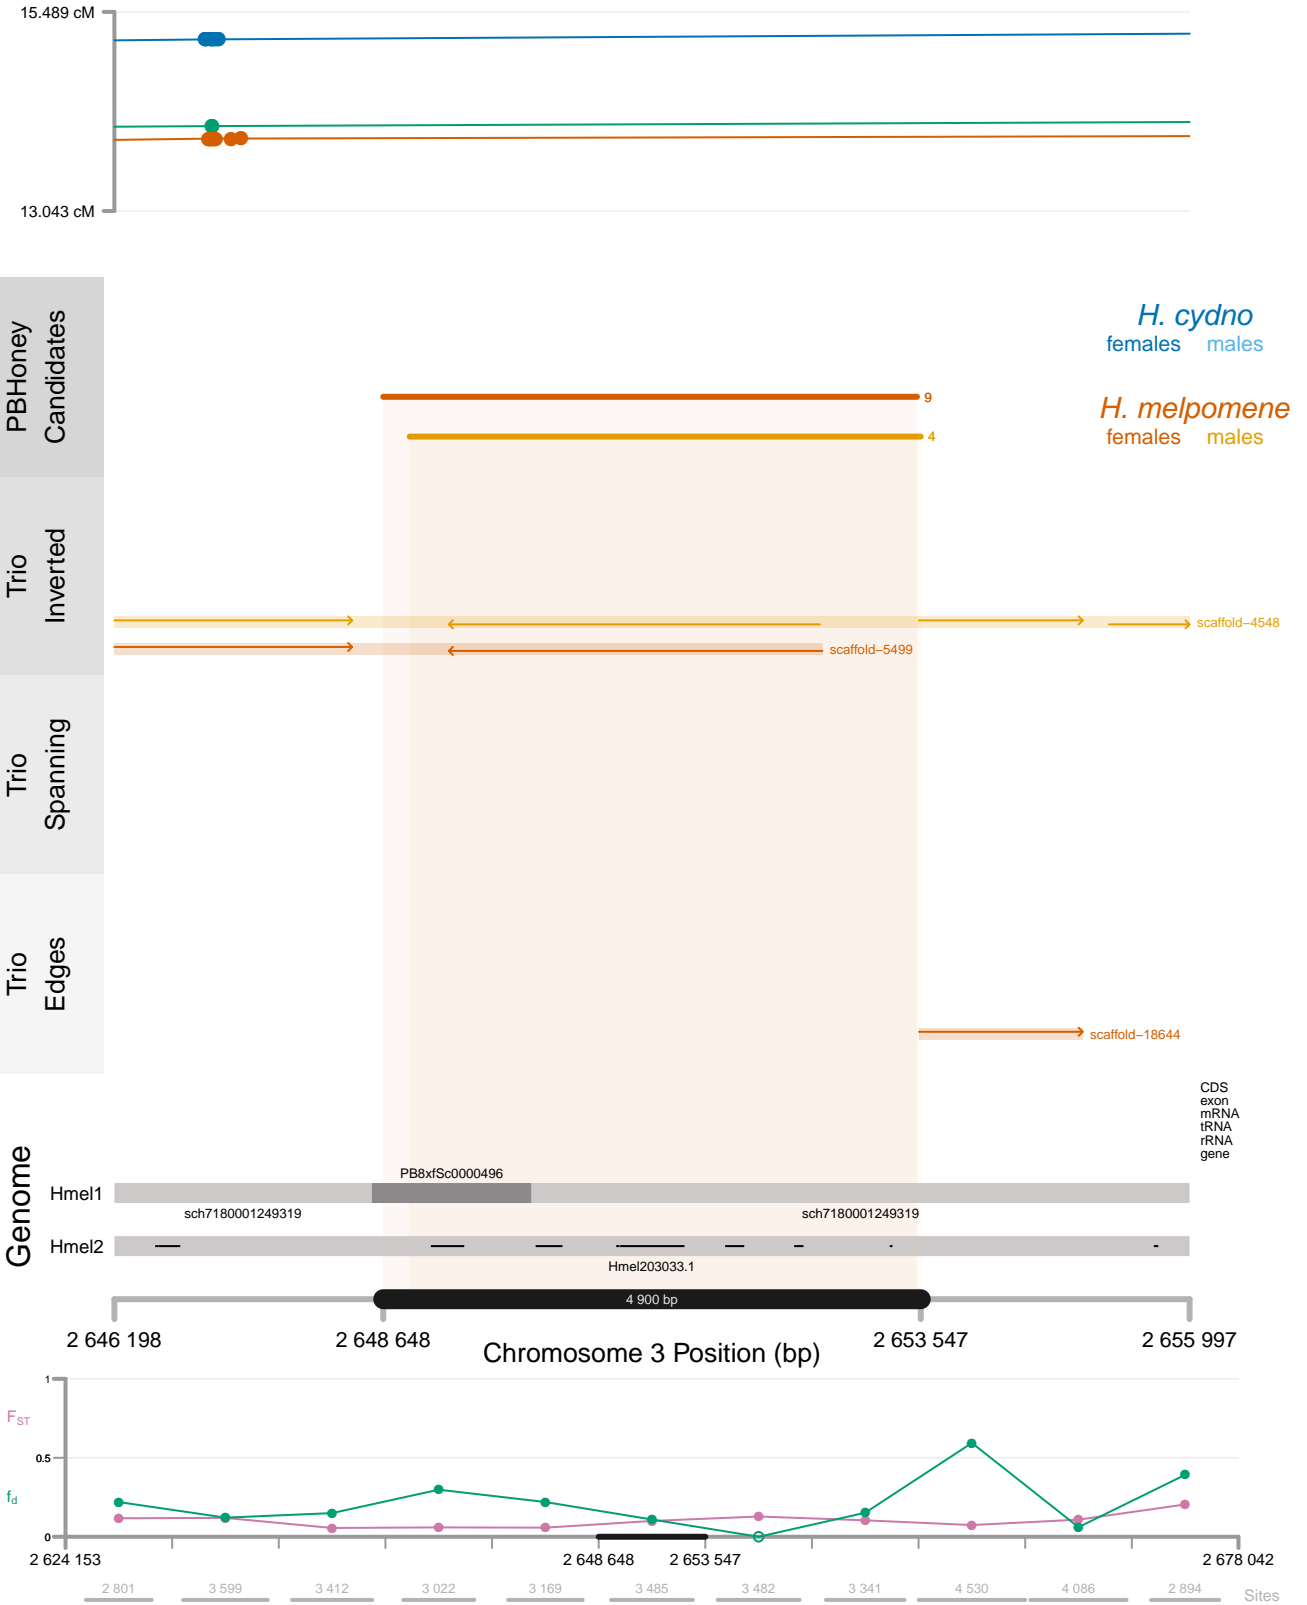

Figure S10.5

*H. melpomene*

Split reads and trio assembly

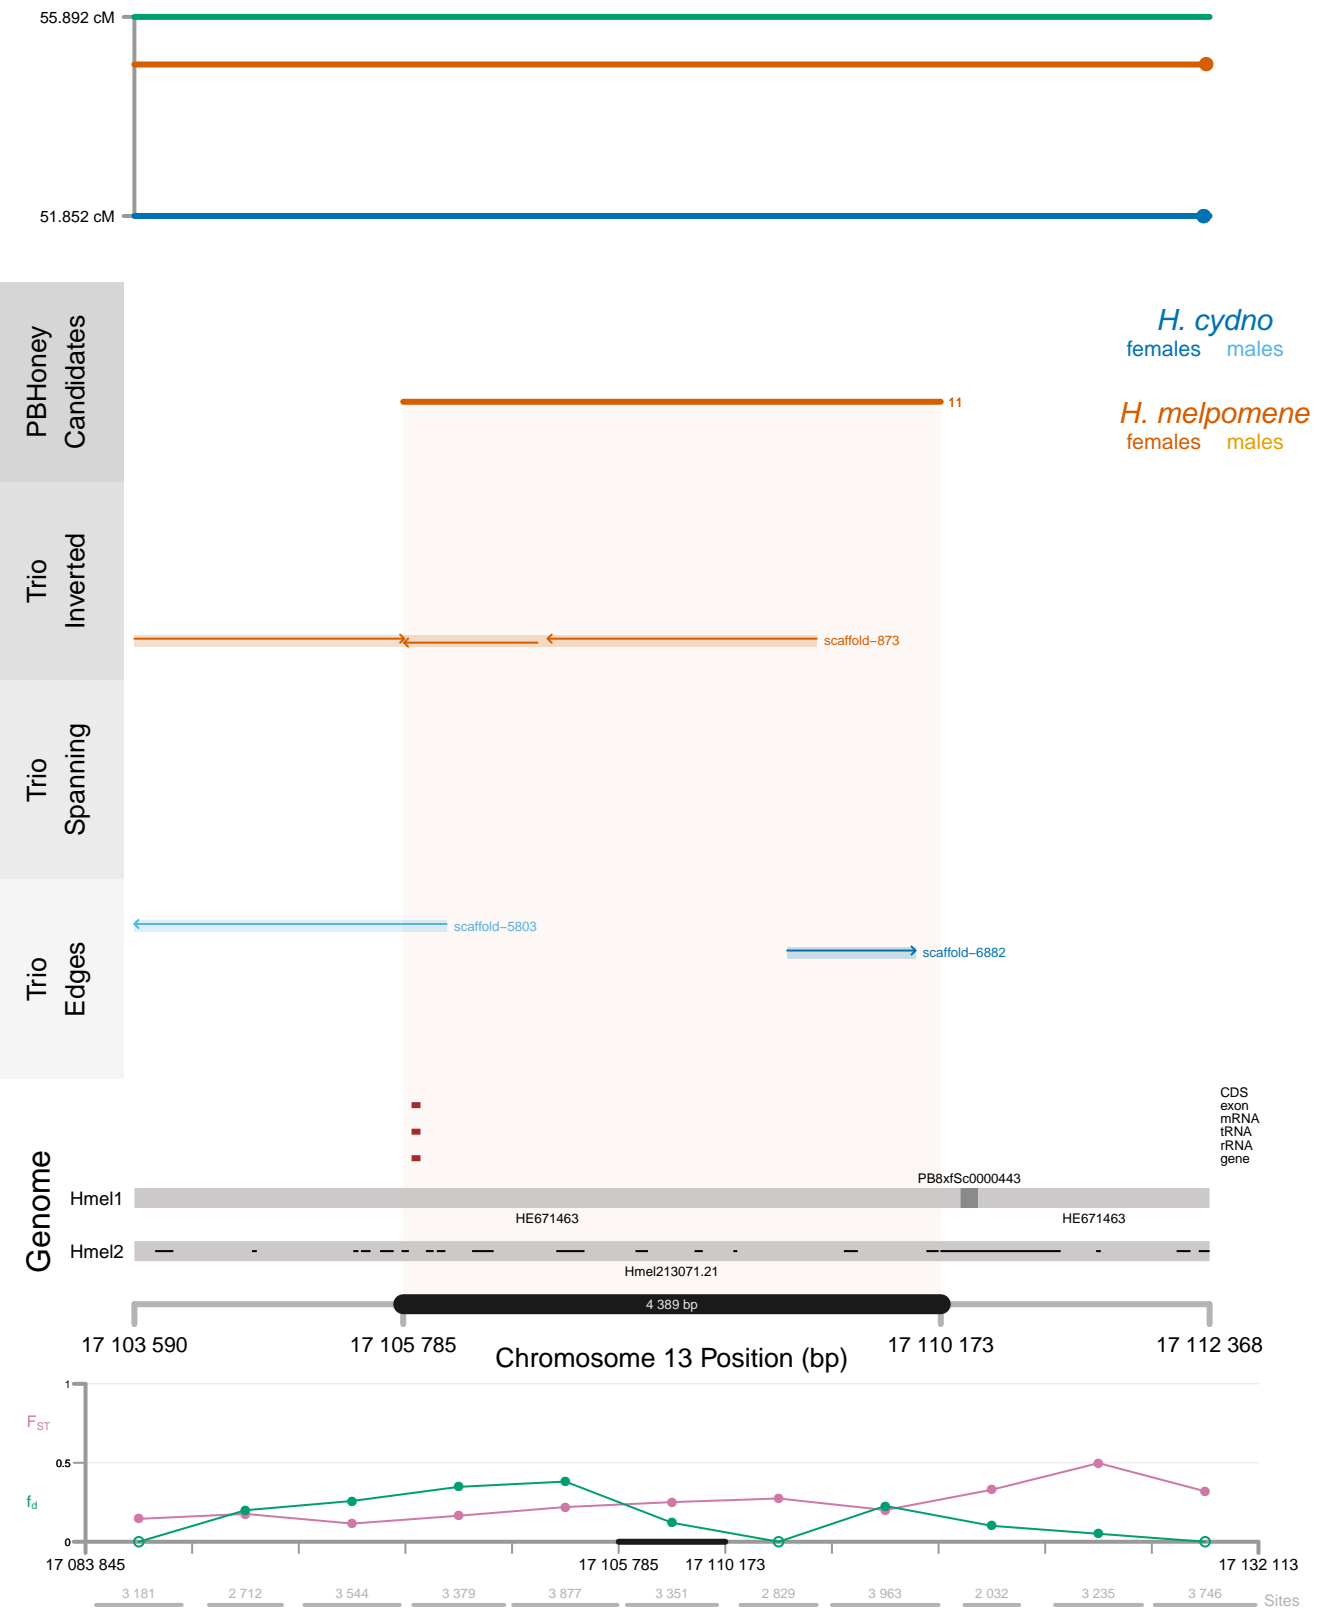

Figure S10.6

*H. melpomene*

Split reads and trio assembly

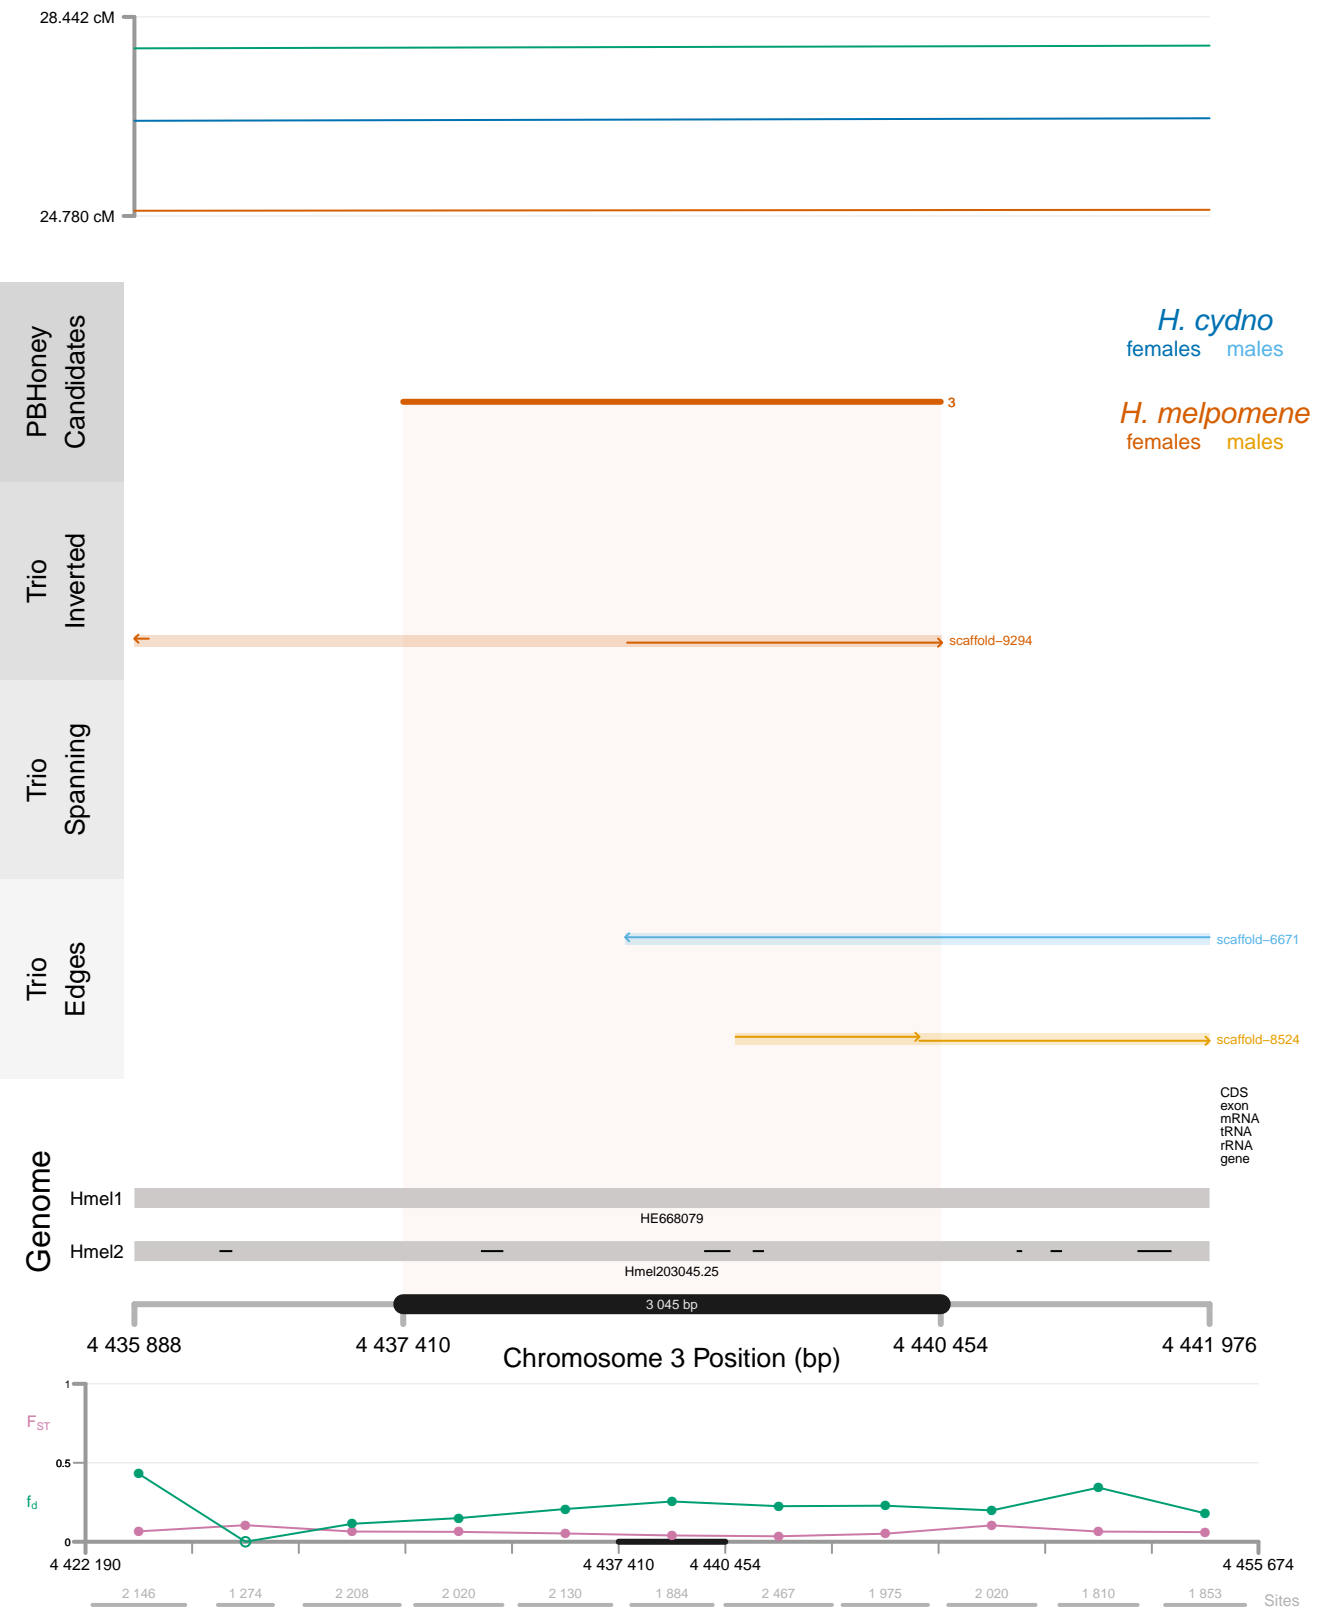

Figure S10.7

*H. melpomene*

Split reads and trio assembly

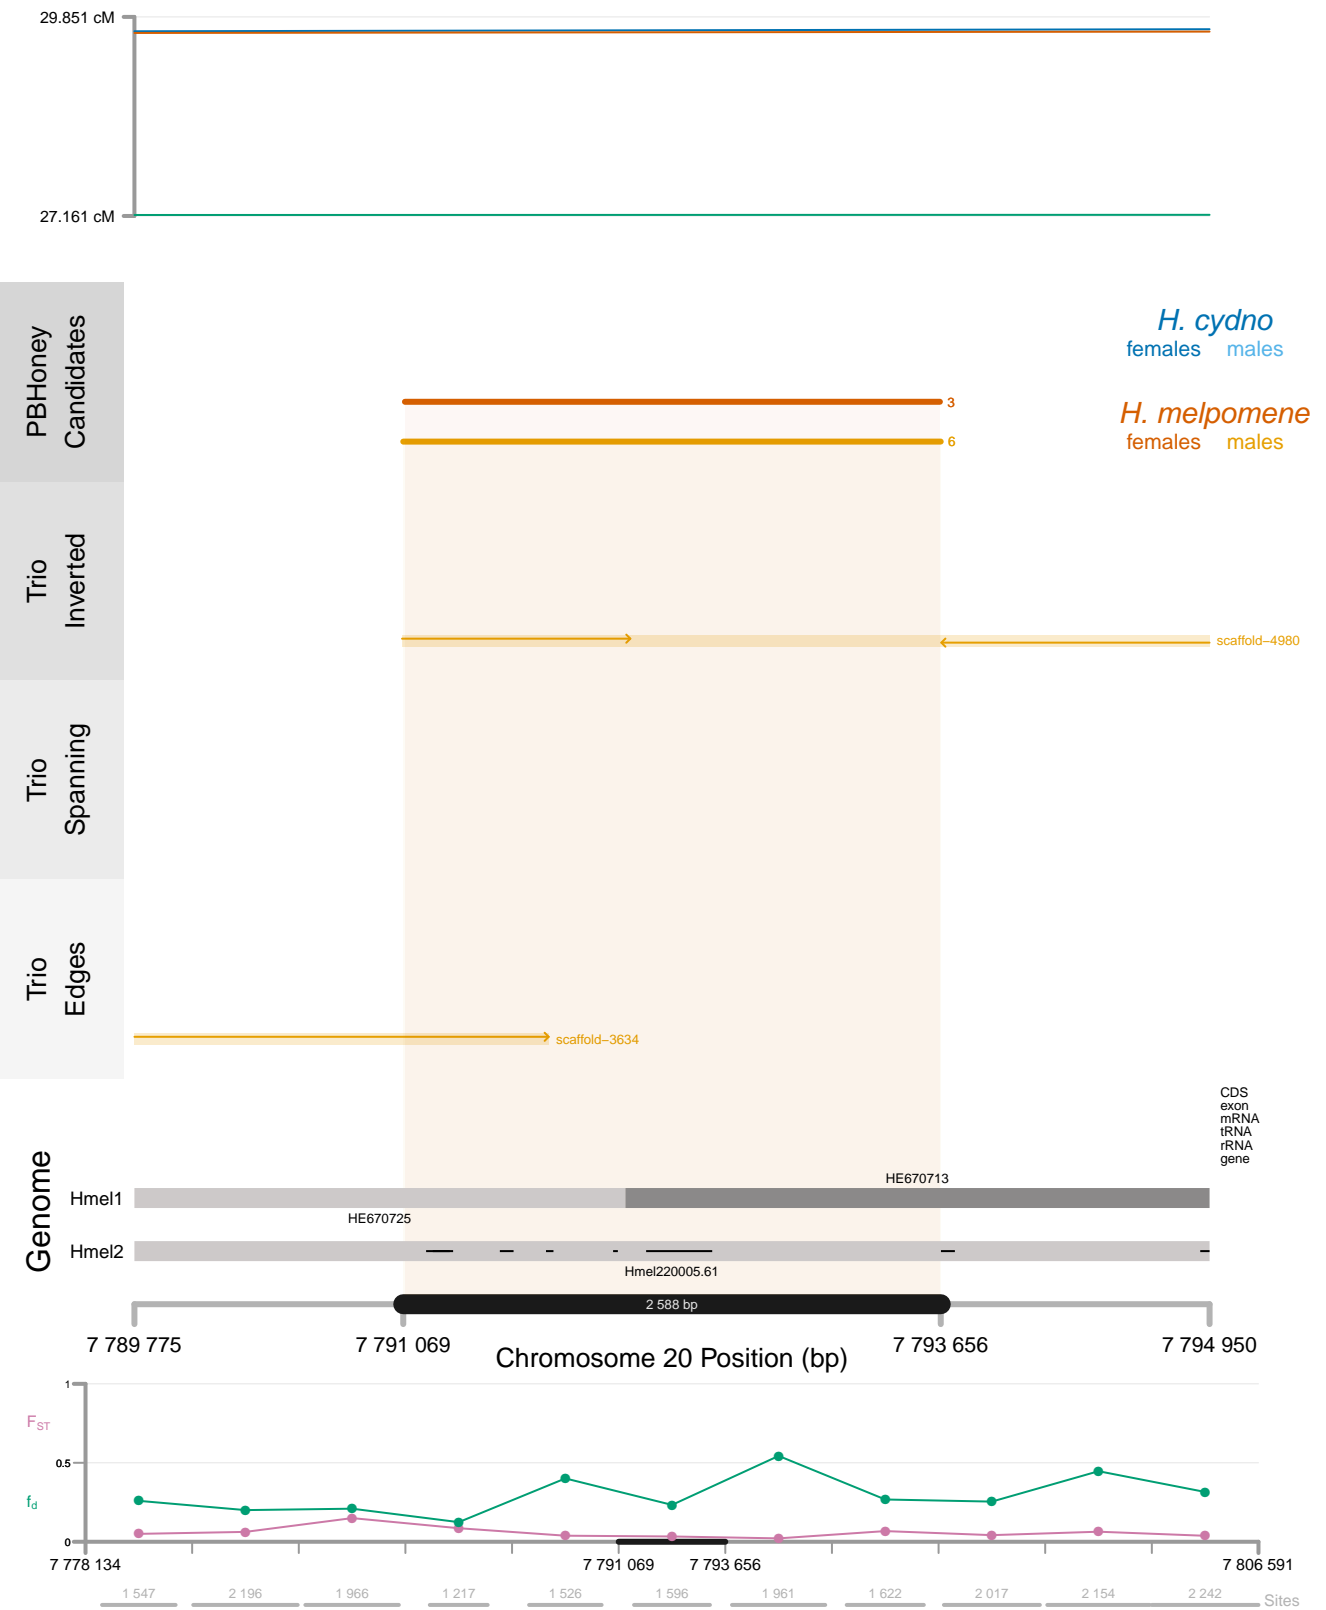

Figure S10.8

*H. melpomene*

Split reads and trio assembly

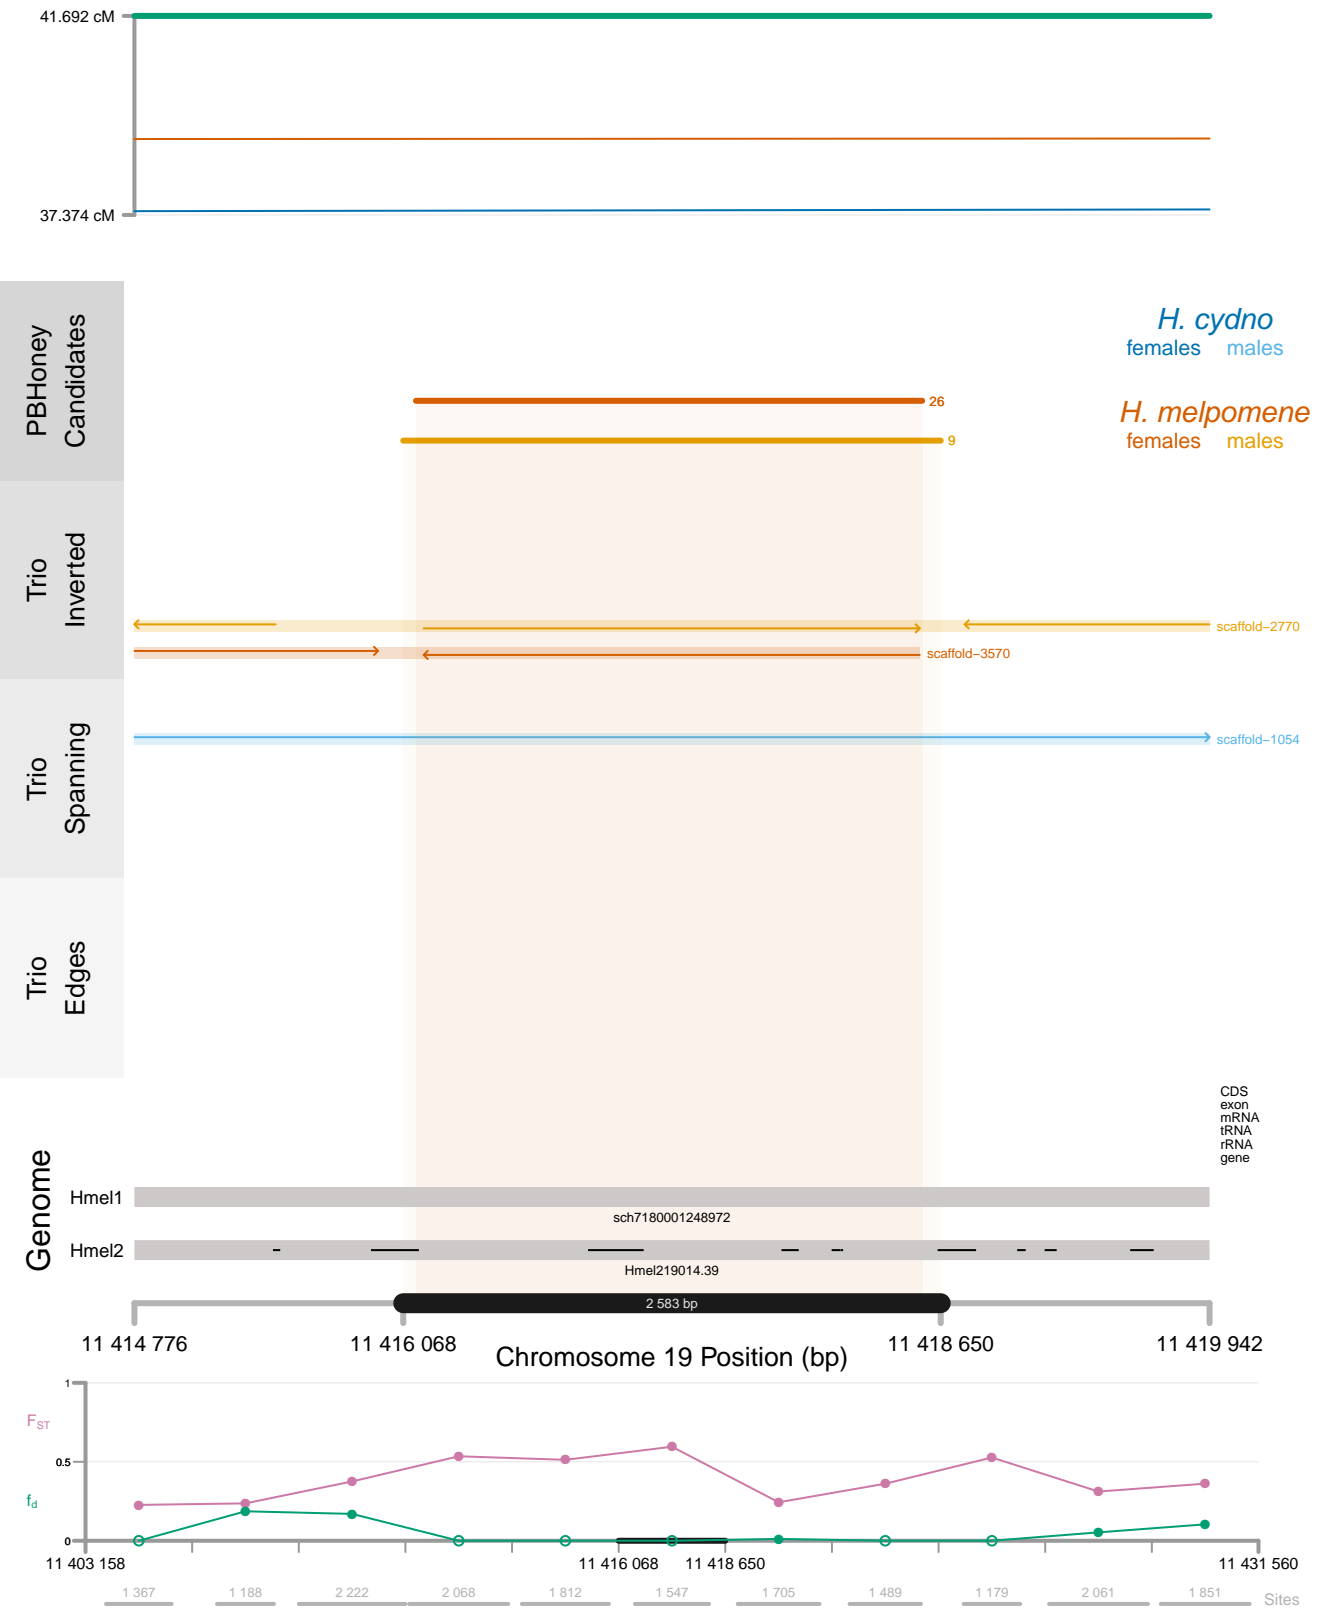



Figure S10.9

*H. melpomene*

Split reads and trio assembly

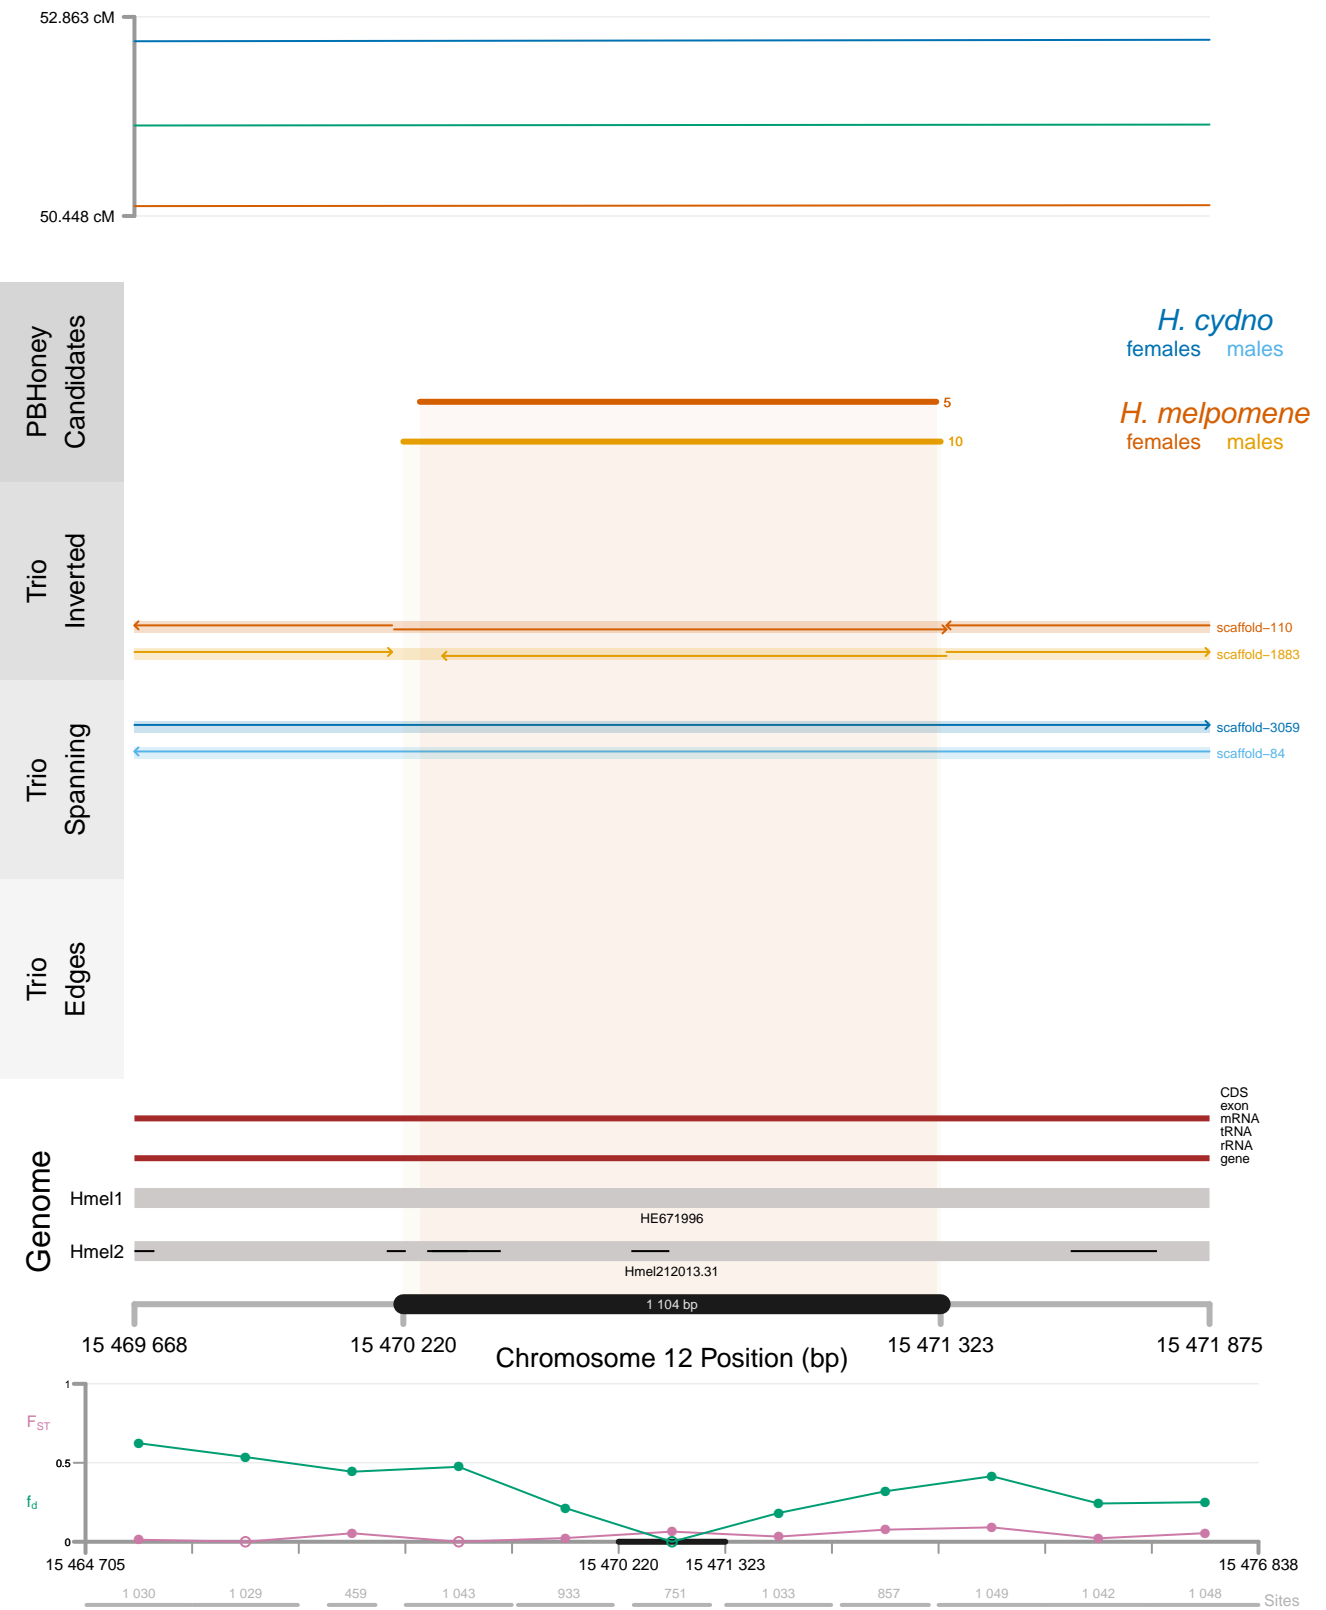

Supplement: Supplementary file [file 083931-10.pdf]
